# Supplementary material for: Parameter uncertainty quantification using surrogate models applied to a spatial model of yeast mating polarization
Source: PubMed Central journal article supplement (PMC5993324; doi:10.1371/journal.pcbi.1006181), 2018-05-29
Supplement: pcbi.1006181.s006.pdf [file pcbi.1006181.s006.pdf]

| Parameter | Value                                                    |
|-----------|----------------------------------------------------------|
| $k_{RL}$  | $2 \times 10^{-3} \text{ nM}^{-1}\text{s}^{-1}$          |
| $k_{RLm}$ | $10^{-2} \text{ s}^{-1}$                                 |
| $k_{Rs}$  | 4 molecules per cell $\text{s}^{-1}$                     |
| $k_{Rd0}$ | $4 \times 10^{-4} \text{ s}^{-1}$                        |
| $k_{Rd1}$ | $4 \times 10^{-3} \text{ s}^{-1}$                        |
| $k_{G1}$  | $1 \text{ (molecules per cell)}^{-1}\text{s}^{-1}$       |
| $Gt$      | 10000 molecules per cell                                 |
| $k_{Ga}$  | $10^{-5} \text{ (molecules per cell)}^{-1}\text{s}^{-1}$ |
| $k_{Gd}$  | $0.11 \text{ s}^{-1}$                                    |

**S1 Table. Parameter values for Model 1.** Parameter values are taken from [37]. Values for  $k_{Ga}$  and  $k_{Gd}$  were estimated based on least-squares fit to time course and dose-response data.
