# Supplementary material for: Parameter uncertainty quantification using surrogate models applied to a spatial model of yeast mating polarization
Source: PubMed Central journal article supplement (PMC5993324; doi:10.1371/journal.pcbi.1006181), 2018-05-29
Supplement: pcbi.1006181.s007.pdf [file pcbi.1006181.s007.pdf]

| Time course data         |              |                     | Dose-response data       |              |                   |
|--------------------------|--------------|---------------------|--------------------------|--------------|-------------------|
| $\alpha$ -factor ( $L$ ) | Time ( $T$ ) | Output              | $\alpha$ -factor ( $L$ ) | Time ( $T$ ) | Output            |
| 1000 nM                  | 10 s         | $0.3504 \pm 0.008$  | 1 nM                     | 60 s         | $0.06 \pm 0.008$  |
| 1000 nM                  | 30 s         | $0.4 \pm 0.004$     | 2 nM                     | 60 s         | $0.108 \pm 0.02$  |
| 1000 nM                  | 60 s         | $0.368 \pm 0.012$   | 5 nM                     | 60 s         | $0.2 \pm 0.028$   |
| 1000 nM                  | 120 s        | $0.3868 \pm 0.0148$ | 10 nM                    | 60 s         | $0.304 \pm 0.024$ |
| 1000 nM                  | 210 s        | $0.3304 \pm 0.016$  | 20 nM                    | 60 s         | $0.4 \pm 0.012$   |
| 1000 nM                  | 300 s        | $0.242 \pm 0.032$   | 50 nM                    | 60 s         | $0.408 \pm 0.004$ |
| 1000 nM                  | 450 s        | $0.1748 \pm 0.024$  | 100 nM                   | 60 s         | $0.412 \pm 0.012$ |
| 1000 nM                  | 600 s        | $0.1948 \pm 0.016$  |                          |              |                   |

**S2 Table. Experimental data.** Experimental data for the given time points and  $\alpha$ -factor levels from [37], and the resulting data. Output is the fraction of free  $G\beta\gamma$  ( $Gbg/Gt$ ). Data are given as mean  $\pm$  standard deviation.
