# Supplementary material for: Parameter uncertainty quantification using surrogate models applied to a spatial model of yeast mating polarization
Source: PubMed Central journal article supplement (PMC5993324; doi:10.1371/journal.pcbi.1006181), 2018-05-29
Supplement: pcbi.1006181.s008.pdf [file pcbi.1006181.s008.pdf]

| Parameter | Range                |
|-----------|----------------------|
| $k_{RL}$  | $[10^{-4}, 10^{-2}]$ |
| $k_{RLm}$ | $[10^{-3}, 10^{-1}]$ |
| $k_{Rs}$  | $[10^{-1}, 10]$      |
| $k_{Rd0}$ | $[10^{-5}, 10^{-3}]$ |
| $k_{Rd1}$ | $[10^{-4}, 10^{-2}]$ |
| $k_{G1}$  | $[10^{-1}, 10]$      |
| $k_{Ga}$  | $[10^{-6}, 10^{-4}]$ |
| $k_{Gd}$  | $[10^{-2}, 1]$       |

**S3 Table. Parameter ranges for Model 1.** Ranges for the kinetic parameters used for parameter estimation of all 8 parameters in Model 1 (heterotrimeric G-protein model).
