# Supplementary material for: Parameter uncertainty quantification using surrogate models applied to a spatial model of yeast mating polarization
Source: PubMed Central journal article supplement (PMC5993324; doi:10.1371/journal.pcbi.1006181), 2018-05-29
Supplement: pcbi.1006181.s009.pdf [file pcbi.1006181.s009.pdf]

| Parameter  | Sensitivity  | Parameter   | Sensitivity |
|------------|--------------|-------------|-------------|
| $D_{B1m}$  | -0.000240521 | $C_{42t}$   | 0.00831949  |
| $G_t$      | -0.00025359  | $D_{Gbg}$   | -0.0097571  |
| $D_{Ga}$   | -0.000704648 | $B_{1t}$    | 0.0172396   |
| $D_{RL}$   | -0.000734672 | $k_{24d}$   | -0.0184795  |
| $D_{Gd}$   | -0.00106669  | $C_{24t}$   | 0.0203875   |
| $k_{Ga}$   | 0.00151801   | $k_{Cla4a}$ | -0.0210338  |
| $k_{Rs}$   | 0.0015794    | $k_{Cla4d}$ | 0.0247716   |
| $R_t$      | -0.00167628  | $k_{B1cm}$  | 0.0463723   |
| $k_{Rd0}$  | 0.00232993   | $k_{24cm0}$ | -0.0521665  |
| $D_{c24m}$ | -0.00233107  | $k_{B1mc}$  | -0.0550074  |
| $k_{G1}$   | 0.00234184   | $D_{c42a}$  | -0.0557088  |
| $k_{24mc}$ | -0.00243174  | $h$         | 0.056832    |
| $k_{RLm}$  | 0.00348159   | $D_{c42}$   | 0.0624607   |
| $k_{Rd1}$  | 0.00401553   | $q$         | 0.0744311   |
| $k_{Gd}$   | 0.0040475    | $k_{42d}$   | -0.0962736  |
| $D_R$      | -0.00517784  | $k_{24cm1}$ | 0.0999564   |
| $D_G$      | 0.00608915   | $k_{42a}$   | 0.110069    |
| $k_{RL}$   | -0.00789241  |             |             |

**S4 Table. Sensitivity coefficients for Model 2.** Sensitivity coefficients, in order of ascending magnitude, from sensitivity analysis of all 35 parameters in Model 2 using a 5th order surrogate polynomial fit to 5000 sample points.
