# Supplementary material for: Parameter uncertainty quantification using surrogate models applied to a spatial model of yeast mating polarization
Source: PubMed Central journal article supplement (PMC5993324; doi:10.1371/journal.pcbi.1006181), 2018-05-29
Supplement: pcbi.1006181.s011.pdf [file pcbi.1006181.s011.pdf]

## S2. Numerical methods

In our numerical simulations, the cell membrane is simulated as a circle centered at the origin with radius  $2 \mu\text{m}$ . The pheromone gradient is administered from the positive  $x$  direction. The computational domain is parametrized by  $\alpha \in [0, 2\pi]$ , where  $\alpha$  denotes the angle from the negative  $x$ -axis. The surface diffusion of a quantity  $W$  on a circle is given by

$$\nabla_m^2 W = W_{ss}$$

where  $s$  is an arc length parameter,  $ds^2 = dx^2 + dy^2$ . Using the chain rule, this can be computed in terms of the parameter  $\alpha$  as

$$W_{ss} = \frac{s'(\alpha)W_{\alpha\alpha} + s''(\alpha)W_\alpha}{(s'(\alpha))^3}.$$

The numerical method employed utilizes a second order finite difference discretization for the spatial derivatives, and an implicit Crank-Nicolson method (described below) for the temporal approximation. The method is second-order accurate in space and time. In our simulations, the spatial mesh consists of 400 equally spaced points and the time step is  $\Delta t = 10^{-2}$ . The code is written in Fortran.

### Temporal approximation

Consider the problem  $\dot{u} = F(u)$ . Denote the solution  $u$  at time  $t_n = n\Delta t$  by  $u_n$ . Then the problem can be approximated by

$$\frac{u_{n+1} - u_n}{\Delta t} = \frac{1}{2}(F(u_{n+1}) + F(u_n))$$

Moving unknowns to one side,

$$u_{n+1} - \frac{\Delta t}{2}F(u_{n+1}) = u_n + \frac{\Delta t}{2}F(u_n)$$

This requires the solution of a nonlinear equation. To solve the nonlinear system, we use the fixed point iteration:

1. Define  $G(y) = (y - \frac{\Delta t}{2}F(y)) - (u_n + \frac{\Delta t}{2}F(u_n))$ .
2. Let  $y_0 = u_n$ .
3. Iterate  $y_{k+1} = y_k - G(y_k)$  until convergence. Denote the final iterate by  $y$ .
4. Let  $u_{n+1} = y$ .

Since the fixed point iteration is not guaranteed to converge, we make the time-step adaptive in the following way: if the iteration number exceeds 20, reduce the current time-step by a factor of 2.
